# Supplementary material for: A comparison of machine learning classifiers for dementia with Lewy bodies using miRNA expression data
Source: PubMed Central journal article supplement (PMC6822471; doi:10.1186/s12920-019-0607-3), 2019-10-30
Supplement: 12920_2019_607_MOESM1_ESM.pdf [file 12920_2019_607_MOESM1_ESM.pdf]

**Supplementary Table S1. Hyperparameter values in the final GBDT model when using  $\mu$ HEM algorithm**

| #top-ranked miRNA | Hyperparameter              | Value |
|-------------------|-----------------------------|-------|
| 330               | <i>max<sub>depth</sub></i>  | 3     |
|                   | <i>n<sub>tree</sub></i>     | 700   |
|                   | <i>min<sub>split</sub></i>  | 15    |
|                   | <i>min<sub>sample</sub></i> | 1     |
|                   | <i>learning rate</i>        | 0.01  |
